# Supplementary material for: Role of Callous and Unemotional (CU) Traits on the Development of Youth with Behavioral Disorders: A Systematic Review
Source: MDPI journal article supplement (doi:10.3390/ijerph18094712), 2021-04-28
Supplement: s1 [file s1]

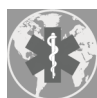

**Table S1.** Characteristics of the studies included in the review

| First author, year     | Country | N    | % Boys | H <sup>1</sup> | Ctx | Adj | Int | Cg |
|------------------------|---------|------|--------|----------------|-----|-----|-----|----|
| Aghajani, 2017         | NL      | 74   | 100    | x              |     |     | x   | x  |
| Bakker-Huvenaars, 2020 | NL      | 114  | 100    | x              |     |     |     | x  |
| Baroncelli, 2020       | IT      | 301  | 49     | x              | x   |     |     |    |
| Bedford, 2019          | UK      | 104  | 40     | x              |     |     |     | x  |
| Bedford, 2017          | USA     | 206  |        | x              | x   |     |     |    |
| Bird, 2019             | UK      | 437  | 51     | x              |     | x   |     | x  |
| Breeden, 2015          | USA     | 47   | 55     | x              |     |     |     |    |
| Craig, 2019            | EU/MC   | 245  | 70     | x              |     |     |     |    |
| Crum, 2016             | CA      | 1554 | 52     | x              | x   | x   |     | x  |
| Dackis, 2015           | USA     | 132  | 52     | x              | x   | x   | x   |    |
| Elizur, 2018           | IL      | 209  | 78     | x              | x   |     |     |    |
| Elizur, 2017           | IL      | 209  | 78     | x              | x   |     |     | x  |
| Erdogan, 2017          | RO      | 51   | 45     | x              |     |     |     | x  |
| Ezpeleta, 2017a        | SP      | 622  | 79     | x              |     |     |     | x  |
| Ezpeleta, 2017b        | SP      | 320  | 51     | x              |     |     |     |    |
| Fagan, 2017            | USA     | 339  | 48     | x              |     |     | x   | x  |
| Fanti, 2017            | CY      | 1200 | 47     | x              | x   | x   |     | x  |
| Georgiou, 2019         | CY      | 163  | 66     | x              |     |     |     |    |
| Gonzalez-Madruga, 2020 | EU/MC   | 200  | 49     | x              |     |     |     |    |
| Graziano, 2019         | USA     | 249  | 78     | x              |     |     |     | x  |
| Grazioplene, 2020      | USA     | 95   | 64     | x              |     |     |     |    |
| Grotzinge, 2018        | USA     | 891  | 49     | x              | x   |     | x   |    |
| Hitti, 2019            | USA     | 265  | 48     | x              |     |     | x   |    |
| Horan, 2016            | USA     | 942  | 49     | x              | x   |     |     | x  |
| Kimonis, 2019          | AU      | 23   | 87     | x              | x   |     | x   |    |
| Kochanska, 2015        | USA     | 82   | 55     |                | x   |     | x   |    |
| Levy, 2017             | IL      | 67   | 100    | x              |     |     | x   |    |
| Masi, 2018             | IT      | 144  | 89     | x              | x   |     |     |    |
| McDonald, 2017         | USA     | 291  | 53     | x              | x   |     |     |    |
| Meffert, 2018          | USA     | 72   |        | x              | x   | x   |     |    |
| Mozley, 2018           | USA     | 829  | 74     | x              |     | x   | x   |    |
| Muratori, 2016         | IT      | 126  | 90     | x              | x   |     |     |    |
| Naaijen, 2020          | EU/MC   | 254  | 73     | x              |     |     |     |    |
| O'Kearney, 2017        | AU      | 124  | 64     | x              |     |     |     |    |
| Raschle, 2018          | EU/MC   | 189  | 43     | x              |     |     |     |    |
| Ray, 2016              | USA     | 1216 | 100    | x              |     |     |     |    |
| Rizeq, 2020            | CA      | 81   | 68     | x              |     |     |     | x  |
| Rogers, 2019           | EU/MC   | 298  | 46     |                |     |     |     | x  |
| Scavenius, 2019        | DK      | 576  | 49     |                | x   |     |     |    |
| Sethi, 2018            | UK      | 95   | 100    | x              |     |     |     | x  |
| Short, 2016a           | UK      | 104  | 62     | x              |     |     |     | x  |
| Short, 2016b           | UK      | 99   | 61     | x              |     |     |     |    |
| Sourander, 2016        | FI      | 464  | 62     |                | x   |     |     |    |
| Takahashi, 2020        | UK      | 8958 |        | x              | x   |     |     |    |
| Thomson, 2019          | UK      | 62   | 86     | x              |     | x   |     |    |
| Wall, 2016             | CY      | 1366 | 47     | x              | x   |     |     | x  |
| Waller, 2015           | USA     | 364  | 51     | x              | x   |     |     |    |
| Waller, 2018           | USA     | 454  | 52     | x              | x   |     | x   |    |

|                  |       |        |    |    |    |   |    |    |
|------------------|-------|--------|----|----|----|---|----|----|
| Werhahn, 2020    | CH/NL | 207    | 73 | x  |    |   |    |    |
| White, 2016      | USA   | 56     | 57 | x  |    |   |    |    |
| Wilkinson, 2020  | UK    | 108    | 61 | x  | x  |   |    | 1  |
| Winstanley, 2020 | UK    | 145    | 77 |    |    | x |    | 1  |
| K=52             |       | 25'823 | 65 | 47 | 22 | 8 | 10 | 19 |

<sup>1</sup> Health, Context, Adjustment, Interactions, Cognition

**Table S2.** Summary of study design, key methods and principal instruments

| Ref. No | First author Year     | Sample (Age mean) | Topic                                               | Study type / design           | Key methods / instruments                                                                                                                                                                                                           |
|---------|-----------------------|-------------------|-----------------------------------------------------|-------------------------------|-------------------------------------------------------------------------------------------------------------------------------------------------------------------------------------------------------------------------------------|
| [69]    | Aghajani 2017         | N = 74 (16.96)    | Connectivity of amygdala                            | Cross-sectional               | Self-reports of CD, aggression, empathy, social responsiveness psychopathic traits and CU traits; fMRI.<br>K-SADS-PL/ICU/BES/SRS/RPQ/YSR/YPI                                                                                        |
| [75]    | Bakker-Huvenaars 2020 | N = 114 (15.4)    | Levels of oxytocin, cortisol, and testosterone      | Cross-sectional               | Caretaker and self-reports of diagnosis (TDI, ASD, ODD/CD) and CU traits; self-report of aggression; individually administered test of intelligence; salivary oxytocin, cortisol and testosterone.<br>SCQ /DISC-IV/WISC-III/RPQ/ICU |
| [105]   | Baroncelli 2020       | N = 301 (12.96)   | Student-teacher relationship                        | Longitudinal T1/T2 (6 months) | Self-report of CU traits and internalizing/externalizing problems; self-reports of student-teacher relationship quality and social preference.<br>ICU/SDQ/STRQ                                                                      |
| [104]   | Bedford 2019          | N = 79 (3,5)      | Executive function as protective factors            | Longitudinal T1/T5 (6 years)  | Clinician rating of ASD ; parent reports of temperament (regulatory function, activity level), ASD, ADHD and CU traits.<br>ADI-R/ADOS-2/SCQ/AOSI/IBQ-R/SRS/ICU/Conners 3                                                            |
| [106]   | Bedford 2017          | N = 206 (3,5)     | Facial emotion recognition and maternal sensitivity | Longitudinal T1/T4 (6 years)  | Measurement of multiple indices of mother-directed gaze, maternal sensitivity, children emotion recognition; parent report of CU traits.<br>FFSFP/ACES/ICU/ASEBA                                                                    |
| [7]     | Bird 2019             | N = 437 (12.50)   | Performance in English, Science and Math grades     | Cross-sectional               | Teacher, parent and self-report of externalizing problems; self-report of CU traits; teacher assessment of academic performance.<br>SPSRQ-C/ICU                                                                                     |

|       |                 |                    |                                                                      |                                     |                                                                                                                                                                                                                                                                                                     |
|-------|-----------------|--------------------|----------------------------------------------------------------------|-------------------------------------|-----------------------------------------------------------------------------------------------------------------------------------------------------------------------------------------------------------------------------------------------------------------------------------------------------|
| [83]  | Breeden<br>2015 | N = 47<br>(14.37)  | White matter integrity                                               | Cross-sectional                     | Parent/guardian report of conduct problems;<br>Parent/guardian and self-report of CU traits;<br>individually administered test of intelligence ;<br>fMRI face-emotion processing task;<br>white matter microstructural integrity assessed<br>using diffusion tensor imaging.<br>K-BIT/ SDQ/CBCL/ICU |
| [99]  | Craig<br>2019   | N = 245<br>(13.2)  | Structure and<br>function fronto-<br>amygdala                        | Cross-sectional                     | Clinician report of conduct problem and<br>aggressive behavior; parent report of CU<br>traits; individually administered test of<br>intelligence; proton magnetic resonance<br>spectroscopy.<br>K-SADS/ICU/RPQ/WISC III/IV                                                                          |
| [70]  | Crum<br>2016    | N = 1554<br>(8.13) | Compare children<br>with ODD alone,<br>CU alone, both<br>and neither | Longitudinal<br>T1/T2<br>(7 months) | Teacher reports of ADHD, ODD, conduct<br>problems, CU traits, quality of student-teacher<br>relationship (STR) and developmental<br>impairment.<br>ADS-IV/NSIC/STRS/IRS                                                                                                                             |
| [107] | Dackis<br>2015  | N = 132<br>(10.36) | Effects of child<br>maltreatment                                     | Cross-sectional                     | Counselor report of CU traits and CD; self-<br>report of antisocial behaviors and substance<br>use; measures of physiological responses to<br>visual stimuli (pleasant, neutral, and<br>unpleasant images) using acoustic startle<br>response (ASR).<br>MCS/ICU/TRF/SRA                             |
| [108] | Elizur<br>2018  | N = 209<br>(4.01)  | Parent training's<br>effects                                         | Longitudinal<br>T1/T2<br>(3 years)  | Teacher report of CD ; parent reports of<br>effortful control, CU traits, CD, parenting<br>practices, parental distress, helplessness,<br>parenting inefficacy; parental training.<br>ECBI/CBQ/ICU/APQ/PSI-SF                                                                                       |
| [109] | Elizur<br>2017  | N = 209<br>(4.01)  | Parent training's<br>effects                                         | Longitudinal<br>T1/T2<br>(3 years)  | Parents reports of effortful control, CU traits,<br>CD, parenting practices, parental distress,<br>helplessness, parenting inefficacy; parental<br>training.<br>ECBI/CBQ/ICU/APQ/PSI-SF                                                                                                             |

|       |                   |                    |                                           |                                    |                                                                                                                                                                                                                                                                                                                                                                                                                                         |
|-------|-------------------|--------------------|-------------------------------------------|------------------------------------|-----------------------------------------------------------------------------------------------------------------------------------------------------------------------------------------------------------------------------------------------------------------------------------------------------------------------------------------------------------------------------------------------------------------------------------------|
| [72]  | Erdogan<br>2017   | N = 51<br>(5.25)   | Attentional orientation and emotions      | Cross-sectional                    | Parent reports of child anxiety and temperament; teacher report of CU traits; parent and teacher report of emotional and behavioral problems (EBP); attentional orienting of emotional faces assessed by pictorial Dot-probe task.<br>SCAS/ICU/CBCL/CBQ                                                                                                                                                                                 |
| [21]  | Ezpeleta<br>2017a | N = 622<br>(3,77)  | Co-occurrence with anxiety and ODD levels | Longitudinal<br>T1/T6<br>(4 years) | Teacher reports of CU traits, ODD, temperament, executive function, aggressive behavior, social cognition deficit and irritability; parent reports of anxiety, EBP, emotion regulation, risk factors, parental practices, child sensitivity to reinforcement, child psychological disorder, adult psychopathology; assessment of attention function and response inhibition; clinician report of functional impairment.<br>ICU/SDQ/CBCL |
| [71]  | Ezpeleta<br>2017b | N = 320<br>(8,0)   | Emotional recognizing                     | Cross-sectional                    | Teacher reports of ODD and CU traits; attention to emotion task; go/no-go task.<br>SDQ/ICU                                                                                                                                                                                                                                                                                                                                              |
| [84]  | Fagan<br>2017     | N = 339<br>(9,6)   | Autonomic nervous system activity         | Cross-sectional                    | Parent reports for aggressive behavior, rule breaking, narcissism, impulsivity, CU traits ; parent interview to assess ODD or CD symptoms; self-report of social adversity; measures of autonomic nervous system (ANS) activity, including heart rate variability (HRV), pre-ejection period (PEP), and heart rate using electrocardiogram.<br>CBCL/APSD/ICU/DISC-IV                                                                    |
| [110] | Fanti<br>2017     | N = 1200<br>(9,38) | Developmental heterogeneity               | Longitudinal<br>T1/T3<br>(1 year)  | Parent and self-reports of CU traits, CD, ADHD, narcissism, impulsivity; parent report of executive dysfunction; parent report of child self-regulation, empathy, and social competence; parent report of parental distress, parental involvement; self-report of perceived social support and school connectedness; teacher reports on academic performance.<br>ICU/CSI-4/YI-4/APSD/ESQ/SEARS/PSI-SF/APQ/MSPSS                         |

|       |                          |                    |                                                           |                                     |                                                                                                                                                                                                                                                                                                                               |
|-------|--------------------------|--------------------|-----------------------------------------------------------|-------------------------------------|-------------------------------------------------------------------------------------------------------------------------------------------------------------------------------------------------------------------------------------------------------------------------------------------------------------------------------|
| [101] | Georgiou<br>2019         | N = 163<br>(4,95)  | Affective and cognitive empathy (ASDs)                    | Cross-sectional                     | Parent report of CU traits, autistic traits, and empathy.<br>SRS/GEM/ICU/ YPI                                                                                                                                                                                                                                                 |
| [86]  | Gonzalez-Madruga<br>2020 | N = 200<br>(15,44) | White matter microstructure of the extended limbic system | Cross-sectional                     | Parent and self-report of CU traits; structural connectivity using diffusion-weighted MRI.<br>K-SADS/WASI/WISC/YPI/ICU                                                                                                                                                                                                        |
| [111] | Graziano<br>2019         | N = 249<br>(4,96)  | Executive function and emotion regulation                 | Cross-sectional                     | Parent and teacher report of CU traits, executive function (EF), emotion regulation and conduct problems including ADHD, ODD and CD symptoms; self-report of self-regulation (EF); assessment of working memory skills; laboratory frustration tasks to elicit emotional distress and regulation.<br>DBD/ICU/BRIEF-P/HTKS/ERC |
| [73]  | Grazio-plene<br>2020     | N = 95<br>(12,6)   | White matter microstructure correlates                    | Cross-sectional                     | Parent report of aggressive behavior, CU traits, ADHD and anxiety; clinician interview for diagnosis; fiber density using fMRI.<br>CBCL/ICU                                                                                                                                                                                   |
| [94]  | Grotzinger<br>2018       | N = 891<br>(15,91) | Links with testosterone and cortisol                      | Cross-sectional                     | Self-report of CU traits, rule breaking and aggression; self-report of pubertal development, peer deviance and prosociality, and parental monitoring; salivary testosterone, hair testosterone and cortisol.<br>CBCL/ICU                                                                                                      |
| [80]  | Hitti<br>2019            | N = 265<br>(12,27) | Effects of anger dysregulation                            | Longitudinal<br>T1/T3<br>(6 months) | Self-report of beliefs supporting aggression, anger dysregulation, CU traits, externalizing behavior; teacher and self-report of physical aggression.<br>BAFS/CAMS/ICU/SSIS-RS/PBFS-AR                                                                                                                                        |
| [112] | Horan<br>2016            | N = 942<br>(8,07)  | Academic outcomes                                         | Longitudinal<br>T1/T2<br>(6 months) | Teacher report of STR quality, conduct problems, CU traits, social competence, aggression, responsibility and teaching stress; self-report of empathic attitudes; math and reading achievement obtained from the Department of Education.<br>STRS/BASC-CP/BASC-A/ICU/CPS/CEAQ/SCS/RS/ITS                                      |

|       |                   |                   |                                                                   |                                     |                                                                                                                                                                                                                                                                                                                                                                                       |
|-------|-------------------|-------------------|-------------------------------------------------------------------|-------------------------------------|---------------------------------------------------------------------------------------------------------------------------------------------------------------------------------------------------------------------------------------------------------------------------------------------------------------------------------------------------------------------------------------|
| [87]  | Kimonis<br>2019   | N = 23<br>(4,5)   | Parent-Child<br>interaction<br>therapy                            | Longitudinal<br>T1-T2<br>(6 months) | Parent/caregiver report of CU traits, conduct problems, empathy and treatment acceptability, parental therapy<br>ICU/ECBI/ASEBA/CBCL/GEM/TAI                                                                                                                                                                                                                                          |
| [113] | Kochanska<br>2015 | N = 82<br>(5,5)   | Parenting<br>environment                                          | Longitudinal<br>T1/T6<br>(8 years)  | Positive, mutually responsive parenting (MRO) observed in naturalistic contexts; power-assertive discipline observed in laboratory room; children's anger proneness laboratory assessment; cheek swabs for genotyping; parent report of children's socialization outcomes and CU traits; self-report of attitude toward substance use and internalization of adult values.<br>AVI/ICU |
| [79]  | Levy<br>2017      | N = 67<br>(16,2)  | Oxytocin levels                                                   | Cross-<br>sectional                 | Teacher and self-report of CU traits, social, emotional, and behavioral functioning ; past aggressive and delinquent behavior documented in personal files; salivary oxytocin.<br>ICU/SDQ/BGLAS                                                                                                                                                                                       |
| [96]  | Masi<br>2018      | N = 144<br>(8,7)  | Developmental<br>trajectories                                     | Longitudinal<br>T1-T4<br>(6 years)  | Clinical interview to assess psychiatric symptoms; self-report of CU traits and substance use; parent report of externalizing behavioral problems, parenting practices and use of mental health services; psycho-pharmacological intervention documented in clinical records.<br>ICU/K-SADS-PL/WISC-III/APQ/CBCL/CSAP                                                                 |
| [114] | McDonald<br>2017  | N = 291<br>(9,07) | Exposure<br>domestic<br>violence and to<br>animal<br>maltreatment | Cross-<br>sectional                 | Parent report of children's exposure to animal maltreatment; self-report of exposure to domestic violence; Maternal report of intimate partner violence (IPV); parent/caregiver report of CU traits and behavior problems.<br>PTS/CEDV/CTS/ICU/CBCL                                                                                                                                   |
| [115] | Meffert<br>2018   | N = 72<br>(13,78) | Prior trauma<br>exposure                                          | Cross-<br>sectional                 | Self-report of trauma; individually administered test of intelligence; parent report of internalizing and externalizing behavior, including levels of anxiety and post-traumatic stress disorder; parent and self-report of CU traits; morphed faces fMRI task; vignette procedure to assess social goals.                                                                            |

| CTQ/WASI-II/CBCL/ICU |                   |                    |                                                    |                                    |                                                                                                                                                                                                                                                                                                                                                                                                                                                                                                                                                                                                                     |
|----------------------|-------------------|--------------------|----------------------------------------------------|------------------------------------|---------------------------------------------------------------------------------------------------------------------------------------------------------------------------------------------------------------------------------------------------------------------------------------------------------------------------------------------------------------------------------------------------------------------------------------------------------------------------------------------------------------------------------------------------------------------------------------------------------------------|
| [116]                | Mozley<br>2018    | N = 829<br>(16,07) | Trauma<br>exposure and<br>overmodulation           | Cross-<br>sectional                | Self-report of trauma exposure, posttraumatic stress and CU traits; recidivism assessed by youth charges in juvenile justice records.<br>PTSD-RI/ICU                                                                                                                                                                                                                                                                                                                                                                                                                                                                |
| [117]                | Muratori<br>2016  | N = 126<br>(10,0)  | Positive and<br>negative<br>parenting<br>practices | Longitudinal<br>T1/T2<br>(2 years) | Self-report of CU traits; mother report of parenting practices and behavioral problems; clinician global functioning evaluation; clinician report of child global functioning improvement.<br>K-SADS-PL/WISC-III/CBCL/ICU/APQ                                                                                                                                                                                                                                                                                                                                                                                       |
| [118]                | Naaijen<br>2020   | N = 254<br>(13,25) | Cortical and<br>subcortical<br>alterations         | Cross-<br>sectional                | Structured diagnostic interviews to confirm clinical diagnoses of ODD, CD and possible comorbid ADHD; clinician report of aggressive/disruptive behavior; self-report of aggressive behavior; parent report of CU traits; measures of cortical volumes and cortical thickness (CT) and surface area using sMRI.<br>K-SADS/CBCL/RPQ/ICU/WISC-III-IV                                                                                                                                                                                                                                                                  |
| [119]                | O'Kearney<br>2017 | N = 124<br>(5,8)   | Emotional<br>process                               | Cross-<br>sectional                | Semi-structured diagnostic clinical interview, brief history-taking and developmental assessment with parent; child's emotional competencies, emotion perception, causal understanding of emotion assessment during interview; vignette procedure to assess emotion perspective-taking, ambivalent or mixed ambivalent emotional responses; clinical assessment of ODD; parent report of CU traits, empathy, emotional and behavioral problems; individually administered test of expressive vocabulary; parent report of emotional status (parental anxiety, depression and stress).<br>ICU/DAKT/GEM/EVT0/DASS/SDQ |
| [74]                 | Raschle<br>2018   | N = 189<br>(13,55) | Gray matter<br>volume                              | Cross-<br>sectional                | Clinical diagnostic interview; clinician report of behavioral and emotional problems; individually administered test of intelligence; parent report of empathy; parent and self-report of CU traits; MPAGE/FRMI /voxel-based morphometry.<br>K-SADS-PL/CBCL/WASI/WISC-IV/ICU/YPI                                                                                                                                                                                                                                                                                                                                    |

|       |                   |                     |                                             |                     |                                                                                                                                                                                                                                                                                                                                                                        |
|-------|-------------------|---------------------|---------------------------------------------|---------------------|------------------------------------------------------------------------------------------------------------------------------------------------------------------------------------------------------------------------------------------------------------------------------------------------------------------------------------------------------------------------|
| [120] | Ray<br>2016       | N = 1216<br>(15,29) | Role of<br>neighborhood<br>disorders        | Cross-<br>sectional | Self-report of delinquent behavior, abuse<br>substance use, CU traits, impulse control,<br>neighborhood disorder.<br>WASI/SRO/ICU/WAI/SUAI/ND                                                                                                                                                                                                                          |
| [85]  | Rizeq<br>2020     | N = 81<br>(9,54)    | Executive<br>functions                      | Cross-<br>sectional | Individually administered test of intelligence,<br>cognitive flexibility, inhibitory control;<br>structured interview to assess psychiatric<br>disorders, symptoms, and level of impairment;<br>parent reports of ADHD, ODD, CD, CU traits,<br>executive functioning, and emotional and<br>behavioral problems.<br>K-BIT/ICU/CBCL/TMT                                  |
| [82]  | Rogers<br>2019    | N = 298<br>(13,5)   | White matter<br>alterations                 | Cross-<br>sectional | Clinical diagnostic interview to assess for CD<br>and other common comorbid disorders; parent<br>report of CU traits; individually administered<br>test of intelligence; pubertal development<br>assessment; emotional Go/No-Go task to assess<br>for impulsivity; white matter alterations<br>measurement using sMRI.<br>K-SADS-PL/ICU/WASI                           |
| [121] | Scavenius<br>2019 | N = 576<br>(14,5)   | Functional<br>Family Therapy                | Cross-<br>sectional | Parent and self-report emotional, and behavioral<br>functioning, family functioning, youth school<br>attendance, school performance, and drug and<br>alcohol use; parent report of CU traits.<br>SDQ/SCORE-15/ICU                                                                                                                                                      |
| [81]  | Sethi<br>2018     | N = 95<br>(14,4)    | Empathic<br>processing                      | Cross-<br>sectional | Teacher and parent report of CD, CU traits;<br>parent report of ADHD, anxiety, depression,<br>and substance/alcohol abuse symptom;<br>individually administered test of intelligence;<br>self-report of alcohol and drug use disorder;<br>parent report of youth mood disorders; vignette<br>procedure to assess affective introspection; fMRI<br>SDQ/CASI-CD/ICU/WASI |
| [122] | Short<br>2016a    | N = 104<br>(16,6)   | Attentional<br>biases to<br>emotional faces | Cross-<br>sectional | Clinical interview to assess for CD and ODD;<br>self-report of CU traits, anxiety and depressive<br>symptoms; visual-probe task to assess attention<br>to emotion.<br>K-SADS-PL/ICU/STAI/HADS                                                                                                                                                                          |

|       |                   |                     |                                                        |                                    |                                                                                                                                                                                                                                                                                                                |
|-------|-------------------|---------------------|--------------------------------------------------------|------------------------------------|----------------------------------------------------------------------------------------------------------------------------------------------------------------------------------------------------------------------------------------------------------------------------------------------------------------|
| [123] | Short<br>2016b    | N = 99<br>(16,6)    | Comorbid<br>anxiety and<br>emotion<br>recognition      | Cross-<br>sectional                | Clinical interview to assess for CD and ODD;<br>self-report of CU traits, anxiety and depressive<br>symptoms; assessment of social disadvantage;<br>facial identity recognition and facial emotion<br>recognition tasks.<br>K-SADS-PL/ICU/STAI/HADS/NES/BFRT                                                   |
| [124] | Sourander<br>2016 | N = 464<br>(4,5)    | Internet-assisted<br>parent training<br>intervention   | Longitudinal<br>T0/T2<br>(1 year)  | Parent report of conduct problems, externalizing<br>behavior, CU traits ; depression, anxiety, stress<br>and satisfaction; parent training.<br>CBCL/ICU                                                                                                                                                        |
| [88]  | Takahashi<br>2020 | N = 8958<br>(11,08) | Genetic and<br>environmental<br>influences             | Longitudinal<br>T1/T4<br>(9 years) | Parent report of CU traits;<br>phenotype tests (twin pairs DZ-MZ).<br>ICU/SDQ/APSD                                                                                                                                                                                                                             |
| [77]  | Thomson<br>2020   | N = 62<br>(12,54)   | Emotions and<br>(para)<br>sympathetic<br>reactivity    | Cross-<br>sectional                | Self-report of CU traits, arousal and emotional<br>reactivity; parent report of conduct problems<br>and prosocial behavior; emotional and<br>physiological reactivity to fear through 3D roller<br>coaster simulation video; fear reactivity and<br>physiological data assess by electrocardiogram.<br>ICU/SDQ |
| [76]  | Wall<br>2016      | N = 1366<br>(9,38)  | Characteristics<br>of children with<br>ou without CU   | Longitudinal<br>T1/T3<br>(1 year)  | Parent report of CU traits, conduct problems,<br>impulsivity, executive control; parent and self-<br>report of parental involvement and positive<br>parenting; self-report of school connectedness.<br>ICU/CSI-4/APSD/SEARS/ESQ/APQ/MSPSS                                                                      |
| [125] | Waller<br>2015    | N = 364<br>(3,0)    | Parental<br>harshness                                  | Longitudinal<br>T1/T3<br>(2 years) | Parent report of CU traits, behavior problems,<br>parenting practices, warmth in the parent-<br>child relationship; observed harsh parenting<br>assessed by coded videotaped family tasks;<br>parental warmth coded from 5-min parental<br>speech samples.<br>ECBI/ACRS/ICU/FAARS                              |
| [36]  | Waller<br>2018    | N = 454<br>(7,8)    | Parenting and<br>behavior<br>problems                  | Cross-<br>sectional                | Parent report of parental harshness, parental<br>warmth, aggression, CU traits, interviews.<br>PEQ/ICU/STAB                                                                                                                                                                                                    |
| [126] | Werhahn<br>2020   | N = 207<br>(13,3)   | Resting state<br>functional<br>connectivity<br>(brain) | Cross-<br>sectional                | Semi-structured diagnostic clinical interview,<br>including ADHD; self-report of aggression;<br>parent report of CU traits; measure of functional                                                                                                                                                              |

|       |                    |                   |                                        |                     |                                                                                                                                                                                                                                                                                                                                                                                                            |
|-------|--------------------|-------------------|----------------------------------------|---------------------|------------------------------------------------------------------------------------------------------------------------------------------------------------------------------------------------------------------------------------------------------------------------------------------------------------------------------------------------------------------------------------------------------------|
|       |                    |                   |                                        |                     | connectivity using a seed-to- voxel approach (fMRI).<br>ICU/K-SADS-PL/CBCL/WASI/YSR/TRF                                                                                                                                                                                                                                                                                                                    |
| [127] | White<br>2016      | N = 56<br>(14,74) | Neural<br>correlates                   | Cross-<br>sectional | Parent report of CU traits, aggression ;<br>ultimatum game (social fairness game) task<br>during fMRI ; fMRI.<br>ICU/RPARS                                                                                                                                                                                                                                                                                 |
| [128] | Wilkinson<br>2020  | N = 108<br>(8,88) | Teacher–<br>Student<br>Relationship    | Cross-<br>sectional | Teacher report of antisocial behavior, CU traits,<br>emotion-related behavior and STR quality.<br>BASC/ICU/ERC/STRS                                                                                                                                                                                                                                                                                        |
| [78]  | Winstanley<br>2020 | N = 145<br>(14,6) | Developmental<br>language<br>disorders | Cross-<br>sectional | Individually administered test of intelligence,<br>language ability; self-report of CU traits;<br>measure of adversity constructed from the data<br>extracted from the youth justice service files;<br>prior offending and age at first offence obtained<br>via detailed scrutiny of departmental files in<br>each youth justice setting; assessment of area-<br>level deprivation.<br>WASI/ICU/CELF-4/IMD |

Note: **ACES**: Assessment of Children’s Emotional Skills; **ACRS**: Adult Child Relationship Scale; **ADI-R**: Autism Diagnostic Interview—Revised; **ADOS-2** : Autism Diagnostic Observation Schedule—Second Edition; **Ag-AgCI** **ADS-IV**:Assessment of Disruptive Symptoms–DSM-IV Version; **AOSI**: Autism Observation Scale for Infants; **APQ**:Alabama Parenting Questionnaire; **APSD**: Antisocial Process Screening Device; **ASEBA**: Achenbach System of Empirically Based Assessment; **AVI**: Adolescent Values Inventory; **BAFS**: Beliefs About Fighting Scale; **BASC**: Behavioral Assessment System for Children **BASC-A**: Behavioral Assessment System for Children—Aggression; **BASC-CP**: Behavioral Assessment System for Children—Conduct Problems; **BES**: Basic Empathy Scale; **BFRT**: Benton Facial Recognition Test; **BGLAS**: Brown-Goodwin Lifetime Aggression Scale; **BRIEF-P**: Behavior Rating Inventory of Executive Function–Preschool Version; **CAMS**: Children’s Anger Management Subscale; **CASI-CD**: Child and Adolescent Symptom Inventory–Conduct Disorder; **CBCL**: Child Behavior Checklist; **CBQ**: Child Behavioral Questionnaire; **CEAQ**: Children’s Empathic Attitudes Questionnaire; **CEDV**: Children’s Exposure to Domestic Violence; **CELF-4**: Clinical Evaluation of Language Fundamentals; **Conners 3** : ADHD scale; **CSI-4**: Checkmate plus Child Symptom Inventory for Parents-4; **CPS**: Childhood Psychopathy Scale; **CSAP**: Substance Abuse Prevention Student Survey; **CTQ**: Childhood Trauma Questionnaire; **CTS**: Conflict Tactic Scale; **DAKT**: Denham Affective Knowledge Tests; **DASS**: Depression, Anxiety and Stress Scale; **DBD**: Disruptive Behavior Disorders Rating Scale; **DICS-IV**: Diagnostic Interview Schedule for Children; **ECBI**: Eyberg child behavior inventory; **ERC**: Emotion Regulation Checklist; **ESQ**: Executive Skills Questionnaire; **EVT0**: Expressive Vocabulary Test; **FAARS**: Positive subscale of the Family Affective Attitudes Rating Scale; **FFSFP**: Face-to-Face Still-Face Paradigm; **fMRI**: functional Magnetic Resonance Imaging; **GEM**: Griffith Empathy Measure; **K-BIT**: Kaufman Brief Intelligence Test; **K-SADS-PL**: Kiddie-Schedule; **IBQ-R**: Infant Behavior Questionnaire—Revised; **HADS**: Hospital Anxiety and Depression Scales; **HTKS**: Head-Toes-Knees-Shoulders Task; **ICU**: Inventory of Callous and Unemotional traits; **IMD**: Index of Multiple

Deprivation; **IRS**: Impairment Rating Scale; **ITS**: Index of Teaching Stress; **MCS**: Maltreatment Classification System; **MSPSS**: Multidimensional Scale of Perceived Social Support; **ND**: Neighborhood disorder; **NES**: Neighbourhood Envi-ronment Scale; **NSIC**: Nova Scotia Modified IOWA Connors; **PBFS-AR**: Problem Behavior Frequency Scale Adolescent Report; **PEQ**: Parental Environment Questionnaire; **PSI-SF**: Parenting Stress Index-Short Form; **PTS**: Pet Treatment Survey; **PTSD-RI**: Posttraumatic Stress Disorder Reaction Index; **RPARS**: Reactive/Proactive Aggression Rating Scale; **RPQ**: Reactive-Proactive Aggression Questionnaire; **RS**: Responsibility Scale; **SCAS**: Spence Preschool Anxiety Scale; **SEARS**: Social-Emotional Assets and Resilience scale; **SCORE-15**: Systemic Clinical Outcome and Routine Evaluation; **SCS**: Social Competence Scale; **SCQ**: Social Communication Questionnaire; **SDQ**: Strength and Difficulties Questionnaire; **SPSRQ-C**: Sensitivity to Punishment and Sensitivity to Reward Questionnaire; **SRA**: Self-Reported Antisocial Behavior Scale; **SRO**: Self-report of Offending Scale; **SRS**: Social Responsiveness Scale; **SSIS-RS**: Social Skills Improvement System; **STAB**: Subtypes of Antisocial Behavior Questionnaire; **STAI**: State-Trait Anxiety Inventory; **STRS**: Student-Teacher Relationship Scale; **STRQ**: Student-Teacher Relationship Questionnaire; **SUAI**: Substance Use/Abuse Inventory; **TAI**: Therapy Attitude Inventroy; **TMT**: Trail making Test; **TRF**: Teacher Report Form; **WAI**: Weinberger Adjustment Inventory; **WASI**: Wechsler Abbreviated Scale of Intelligence **WISC**: Wechsler Intelligence Scale for Children; **YI-4**: Checkmate plus Youth's Inventory-4; **YPI**: Youth Psychopathic Traits Inventory; **YSR**: Youth Self-Report.

Table S3. Summary of results – Mental Health

| Ref. No | First author Year     | Sample (Age mean) | Topic                                               | Summary of results                                                                                                                                       |
|---------|-----------------------|-------------------|-----------------------------------------------------|----------------------------------------------------------------------------------------------------------------------------------------------------------|
| [69]    | Aghajani 2017         | N = 74 (16.96)    | Connectivity of amygdala                            | Significant differences on ODD/CD found between groups with or without CU traits (more emotional dysregulation).<br>No links with internalized disorders |
| [75]    | Bakker-Huvenaars 2020 | N = 114 (15.4)    | Levels of oxytocin, cortisol, and testosterone      | ODD linked with high score CU traits                                                                                                                     |
| [105]   | Baroncelli 2020       | N = 301 (12.96)   | Student-teacher relationship                        | Significant links with externalized behavioral disorders were found at T2.<br>No links with internalized disorders                                       |
| [104]   | Bedford 2019          | N = 79 (3,5)      | Executive function as protective factors            | Correlations found between children at high risk of ASD or ADHD and CU traits                                                                            |
| [106]   | Bedford 2017          | N = 206 (3,5)     | Facial emotion recognition and maternal sensitivity | Significant effect of emotion recognition in predicting CU traits                                                                                        |
| [7]     | Bird 2019             | N = 437 (12.50)   | Performance in English, Science and Math grades     | CU traits related to externalizing disorders                                                                                                             |
| [83]    | Breeden 2015          | N = 47 (14.37)    | White matter integrity                              | The severity of externalizing behavior is not related to white-matter integrity after controlling for CU traits                                          |

|       |                   |                    |                                                                      |                                                                                                                                                                                                                 |
|-------|-------------------|--------------------|----------------------------------------------------------------------|-----------------------------------------------------------------------------------------------------------------------------------------------------------------------------------------------------------------|
| [99]  | Craig<br>2019     | N = 245<br>(13.2)  | Structure and<br>function fronto-<br>amygdala                        | Significant links with externalized behavioral disorders and<br>CU traits                                                                                                                                       |
| [70]  | Crum<br>2016      | N = 1554<br>(8.13) | Compare children<br>with ODD alone,<br>CU alone, both<br>and neither | Children with CU Significant links with externalized<br>behavioral disorders (ODD/CD) and CU traits                                                                                                             |
| [107] | Dackis<br>2015    | N = 132<br>(10.36) | Effects of child<br>maltreatment                                     | Significant links with externalized behavioral disorders and<br>CU traits                                                                                                                                       |
| [108] | Elizur<br>2018    | N = 209<br>(4.01)  | Parent training's<br>effects                                         | Significant links with externalized behavioral disorders and<br>CU traits                                                                                                                                       |
| [109] | Elizur<br>2017    | N = 209<br>(4.01)  | Parent training's<br>effects                                         | Significant links between externalized behavioral disorders<br>and CU traits                                                                                                                                    |
| [72]  | Erdogan<br>2017   | N = 51<br>(5.25)   | Attentional orien-<br>tation and emo-<br>tions                       | Significant links with externalized behavioral disorders<br>(ODD) and CU traits<br>Results indicated significant interaction effects between ODD-<br>related problems and CU, as well as between CU and anxiety |
| [21]  | Ezpeleta<br>2017a | N = 622<br>(3,77)  | Co-occurrence<br>with anxiety and<br>ODD levels                      | Significant links between CU traits and externalized<br>behavioral disorders (ODD) and anxiety and/or emotional<br>disorders                                                                                    |
| [71]  | Ezpeleta<br>2017b | N = 320<br>(8,0)   | Emotional recog-<br>nizing                                           | Children with ODD and CU are less accurate in recognizing<br>emotion and deficits in emotion processing                                                                                                         |
| [84]  | Fagan<br>2017     | N = 339<br>(9,6)   | Autonomic nerv-<br>ous system activ-<br>ity                          | Significant links between externalized behavioural disorders<br>and CU traits                                                                                                                                   |
| [110] | Fanti<br>2017     | N = 1200<br>(9,38) | Developmental<br>heterogeneity                                       | Exhibit high and stable levels of conduct problems, attention-<br>deficit/hyperactivity disorder symptoms, impulsivity                                                                                          |
| [101] | Georgiou<br>2019  | N = 163<br>(4,95)  | Affective and cog-<br>nitive empathy<br>(ASDs)                       | CU traits were negatively related with both cognitive and<br>affective empathy in ASD children<br>CU traits negatively predicted affective empathy only among<br>girls high on autistic traits.                 |
| [111] | Graziano<br>2019  | N = 249<br>(4,96)  | Executive function<br>and emotion regu-<br>lation                    | Poorer emotional regulation was associated with greater levels<br>of CU behaviors.                                                                                                                              |
| [80]  | Hitti<br>2019     | N = 265<br>(12,27) | Effects of anger<br>dysregulation                                    | Significant links between externalized behavioral disorders<br>and CU traits<br>Significant links between anger dysregulation and CU traits                                                                     |
| [112] | Horan<br>2016     | N = 942<br>(8,07)  | Academic<br>outcomes                                                 | CU traits are associated with ODD and lack of empathy                                                                                                                                                           |

|       |                   |                    |                                                    |                                                                                                                                                                                                                                                                |
|-------|-------------------|--------------------|----------------------------------------------------|----------------------------------------------------------------------------------------------------------------------------------------------------------------------------------------------------------------------------------------------------------------|
| [87]  | Kimonis<br>2019   | N = 23<br>(4,5)    | Parent-Child<br>interaction<br>therapy             | Intervention produced increases in empathy in child with CU traits                                                                                                                                                                                             |
| [79]  | Levy<br>2017      | N = 67<br>(16,2)   | Oxytocin levels                                    | CU traits are associated with ODD/CD                                                                                                                                                                                                                           |
| [96]  | Masi<br>2018      | N = 144<br>(8,7)   | Developmental<br>trajectories                      | CU traits are associated with externalizing and internalizing disorders                                                                                                                                                                                        |
| [114] | McDonald<br>2017  | N = 291<br>(9,07)  | Exposure to<br>domestic and<br>animal violence     | CU traits are associated with externalizing and internalizing disorders                                                                                                                                                                                        |
| [116] | Mozley<br>2018    | N = 829<br>(16,07) | Trauma<br>exposure and<br>overmodulation           | An association between interpersonal trauma exposure and persistent offending exhibited an indirect effect through overmodulation and CU traits                                                                                                                |
| [117] | Muratori<br>2016  | N = 126<br>(10,0)  | Positive and<br>negative<br>parenting<br>practices | CU traits are associated with externalizing disorders                                                                                                                                                                                                          |
| [119] | O'Kearney<br>2017 | N = 124<br>(5,8)   | Emotional<br>process                               | ODD boys with high levels of CU traits showed deficits in emotion perspective-taking and in understanding ambivalent emotions.                                                                                                                                 |
| [85]  | Rizeq<br>2020     | N = 81<br>(9,54)   | Executive<br>functions                             | Correlations between CU traits and ODD/CD                                                                                                                                                                                                                      |
| [81]  | Sethi<br>2018     | N = 95<br>(14,4)   | Empathic<br>processing and<br>cortex               | Correlations between CU traits and ODD/CD/internalizing disorders<br>Findings provide limited and ultimately equivocal evidence for altered affective introspection regarding others in CP/HCU, and altered affective introspection for own emotions in CP/LCU |
| [122] | Short<br>2016a    | N = 104<br>(16,6)  | Attentional<br>biases to<br>emotional faces        | Within the CD-only and comorbid CD+anxiety disorder groups, there were no significant effects or interactions involving CU traits.                                                                                                                             |
| [123] | Short<br>2016b    | N = 99<br>(16,6)   | Comorbid<br>anxiety and<br>emotion<br>recognition  | CD and CD/anxiety have higher scores of CU traits<br>CU+ differ in the recognition of fear, joy and disgust                                                                                                                                                    |

|       |                   |                    |                                                      |                                                                                                                                                                                                                                          |
|-------|-------------------|--------------------|------------------------------------------------------|------------------------------------------------------------------------------------------------------------------------------------------------------------------------------------------------------------------------------------------|
| [77]  | Thomson<br>2020   | N = 62<br>(12,54)  | Emotions and<br>(para)<br>sympathetic<br>reactivity  | Higher CD in group with CU<br>Youths with CU traits self-reported that they felt more in control after the fear induction. They displayed a physiological and emotional profile suggesting they maintained control during fear induction |
| [76]  | Wall<br>2016      | N = 1366<br>(9,38) | Characteristics<br>of children with<br>ou without CU | The high-CU group had significantly lower hyperactivity-impulsivity                                                                                                                                                                      |
| [125] | Waller<br>2015    | N = 364<br>(3,0)   | Parental<br>harshness                                | Correlation between CU traits and ODD/CD                                                                                                                                                                                                 |
| [128] | Wilkinson<br>2020 | N = 108<br>(8,88)  | Teacher–<br>Student<br>Relationship                  | CU traits are linked to lower emotion understanding/empathy.<br>higher emotion lability                                                                                                                                                  |

#### 3.4. Neurobiological markers and CU traits (physical Health)

**Table S4.** Summary of results – Neurobiological Markers

| Ref. No | First author Year        | Sample (Age mean) | Topic                                          | Summary of results                                                                                                                                                                                                                                                                                                                                                                                                                          |
|---------|--------------------------|-------------------|------------------------------------------------|---------------------------------------------------------------------------------------------------------------------------------------------------------------------------------------------------------------------------------------------------------------------------------------------------------------------------------------------------------------------------------------------------------------------------------------------|
| [69]    | Aghajani<br>2017         | N = 74<br>(16.96) | Connectivity of amygdala                       | Relative to CD/CU showed abnormally increased BLA connectivity with a cluster that included both dorsal and ventral portions of the anterior cingulate and medial prefrontal cortices, along with posterior cingulate, sensory associative, and striatal regions.<br>Connectivity changes coincide with local hypotrophy of BLA and CMA subregions (without being statistically correlated) and were associated to more severe CU symptoms. |
| [75]    | Bakker-Huvenaars<br>2020 | N = 114<br>(15.4) | Levels of oxytocin, cortisol, and testosterone | Higher levels of CU traits were related to higher levels of cortisol and testosterone                                                                                                                                                                                                                                                                                                                                                       |
| [83]    | Breeden<br>2015          | N = 47<br>(14.37) | White matter integrity                         | Both CU traits and externalizing behaviors are negatively correlated with white-matter integrity in bilateral uncinate fasciculus and stria terminalis/fornix, simultaneously modeling both variables revealed that these effects are driven by CU traits.                                                                                                                                                                                  |
| [99]    | Craig<br>2019            | N = 245<br>(13.2) | Structure and function fronto-amygdala         | CU traits were associated with increased anterior cingulate cortex (ACC) glutamate                                                                                                                                                                                                                                                                                                                                                          |

|       |                              |                    |                                                                      |                                                                                                                                                                                                                                                                                                                                                                                                               |
|-------|------------------------------|--------------------|----------------------------------------------------------------------|---------------------------------------------------------------------------------------------------------------------------------------------------------------------------------------------------------------------------------------------------------------------------------------------------------------------------------------------------------------------------------------------------------------|
| [107] | Dackis<br>2015               | N = 132<br>(10,36) | Effects of child<br>maltreatment                                     | Results indicated differential physiological responses for maltreated and non-maltreated children based on CU traits including a pathway of hypo arousal for non-maltreated /high CU children that differed markedly from a more normative physiological trajectory for maltreated/high CU children                                                                                                           |
| [84]  | Fagan<br>2017                | N = 339<br>(9,6)   | Autonomic nerv-<br>ous system activ-<br>ity                          | low resting heart rate but not pre-ejection period or heart rate variability, mediated the relationship between social adversity and antisocial behavior in males only.                                                                                                                                                                                                                                       |
| [86]  | Gonzalez-<br>Madriga<br>2020 | N = 200<br>(15,44) | White matter mi-<br>crostructure of the<br>extended limbic<br>system | Positive correlation between<br>CD and right retrosplenial cingulum hindrance-modulated orientational anisotropy.<br><br>There were no other significant correlations between CD, ADHD symptoms, overall psychopathic traits, the subdimensions<br>of psychopathy, CU traits                                                                                                                                  |
| [73]  | Grazio-<br>plene<br>2020     | N = 95<br>(12,6)   | White matter mi-<br>crostructure corre-<br>lates                     | Co-occurring CU traits and anxiety did not moderate the association between aggression and white matter density; Results reveal lower fiber density in a cluster of limbic and cortical pathways, including the inferior fronto-occipital fasciculus, fornix, middle cerebellar peduncle, and superior thalamic radiations, and had higher fiber density in the corpus callosum.                              |
| [94]  | Grotzinger<br>2018           | N = 891<br>(15,91) | Links with testos-<br>terone and cortisol                            | Salivary testosterone was not associated with aggression. Hair testosterone significantly predicted increased aggression, particularly at low levels of hair cortisol in children with CU                                                                                                                                                                                                                     |
| [79]  | Levy<br>2017                 | N = 67<br>(16,2)   | Oxytocin levels                                                      | Significant effect of conduct disorder and oxytocin on ICU-TR but not ICU-SR                                                                                                                                                                                                                                                                                                                                  |
| [115] | Meffert<br>2018              | N = 72<br>(13,78)  | Prior trauma<br>exposure                                             | Significant CU traits-by-trauma exposure interaction was observed within right amygdala. Pathophysiology associated with CU traits differs in youth as a function of prior trauma exposure.                                                                                                                                                                                                                   |
| [118] | Naaijen<br>2020              | N = 254<br>(13,25) | Cortical and<br>subcortical<br>alterations                           | Proactive aggression was negatively associated with amygdala volume, while reactive aggression was negatively associated with insula volume. No associations were found with CU traits or ADHD symptomatology.<br><br>Study showed negative associations between reactive aggression and volumes in a region involved in threat responsivity and between proactive aggression and a region linked to empathy. |

|       |                   |                     |                                                        |                                                                                                                                                                                                                                                                                                                                                                                                                              |
|-------|-------------------|---------------------|--------------------------------------------------------|------------------------------------------------------------------------------------------------------------------------------------------------------------------------------------------------------------------------------------------------------------------------------------------------------------------------------------------------------------------------------------------------------------------------------|
| [74]  | Raschle<br>2018   | N = 189<br>(13,55)  | Gray matter<br>volume                                  | CU traits have a neuroanatomical correlate within typically developing boys, but not girls : significant positive correlation between CU traits and bilateral anterior insula volume in boys                                                                                                                                                                                                                                 |
| [82]  | Rogers<br>2019    | N = 298<br>(13,5)   | White matter<br>alterations                            | Youths with CD exhibited higher axial diffusivity in the corpus callosum and lower radial diffusivity and mean diffusivity in the anterior thalamic radiation relative to TD youths                                                                                                                                                                                                                                          |
| [81]  | Sethi<br>2018     | N = 95<br>(14,4)    | Empathic<br>processing and<br>cortex                   | Analyses revealed no significant differences of activation in the anterior insula, anterior cingulate cortex / medial prefrontal cortex, and occipital cortex as significantly activated                                                                                                                                                                                                                                     |
| [88]  | Takahashi<br>2020 | N = 8958<br>(11,08) | Genetic and<br>environmental<br>influences             | Individual differences in the baseline level of CU traits were highly heritable (76.5%), while the heritability of the developmental course of CU traits was moderate (43.6%).                                                                                                                                                                                                                                               |
| [77]  | Thomson<br>2020   | N = 62<br>(12,54)   | Emotions and<br>(para)<br>sympathetic<br>reactivity    | Adolescents with high callous-unemotional traits showed coactivation of the sympathetic and parasympathetic nervous system.                                                                                                                                                                                                                                                                                                  |
| [126] | Werhahn<br>2020   | N = 207<br>(13,3)   | Resting state<br>functional<br>connectivity<br>(brain) | Callous-unemotional traits were linked to distinct hyper-connectivities to frontal, parietal, and cingulate areas.                                                                                                                                                                                                                                                                                                           |
| [127] | White<br>2016     | N = 56<br>(14,74)   | Neural<br>correlates                                   | Relative to the other groups, youths with DBD and low levels of callous-unemotional traits showed greater increases in activation of basic threat circuitry when punishing others and dysfunctional down-regulation of the ventromedial prefrontal cortex during retaliation.<br>Relative to healthy youths, all youths with DBD showed reduced amygdala-ventromedial prefrontal cortex connectivity during high provocation |

Table S5. Summary of results – Family and School Context

| Ref.<br>No | First author<br>Year | Sample<br>(Age mean) | Topic                           | Summary of results                                                                                                                             |
|------------|----------------------|----------------------|---------------------------------|------------------------------------------------------------------------------------------------------------------------------------------------|
| [105]      | Baroncelli<br>2020   | N = 301<br>(12,96)   | Student-teacher<br>relationship | Levels of affiliation with teachers are negatively related to levels of CU traits in students with low levels of social preference among peers |

|                         |                    |                    |                                                                      |                                                                                                                                                                                                                                                                                                               |
|-------------------------|--------------------|--------------------|----------------------------------------------------------------------|---------------------------------------------------------------------------------------------------------------------------------------------------------------------------------------------------------------------------------------------------------------------------------------------------------------|
| [106]                   | Bedford<br>2017    | N = 206<br>(3,5)   | Facial emotion<br>recognition and<br>maternal sensitiv-<br>ity       | infants' mother directed gaze and maternal sensitivity are not<br>significant, but their interaction significantly predicted CU<br>traits.                                                                                                                                                                    |
| [70]                    | Crum<br>2016       | N = 1554<br>(8,13) | Compare children<br>with ODD alone,<br>CU alone, both<br>and neither | Children with CD/CU had the highest conflict and lowest<br>closeness with teachers at the start of the school year and the<br>greatest end-of- year impairment,<br>higher conflict and lower closeness with teachers at the school<br>year's start were associated with greater end-of-the-year<br>impairment |
| [107]                   | Dackis<br>2015     | N = 132<br>(10,36) | Effects of child<br>maltreatment                                     | Experience and biology may influence the development of<br>antisocial behavior in youth and highlight potential avenues<br>for intervention                                                                                                                                                                   |
| [108]                   | Elizur<br>2018     | N = 209<br>(4,01)  | Parent training's<br>effects                                         | Significant effects of parenting mediated treatment on both EC<br>and CU traits                                                                                                                                                                                                                               |
| [109]                   | Elizur<br>2017     | N = 209<br>(4,01)  | Parent training's<br>effects                                         | Significant and positive effects of the intervention on the<br>family context and the parent self-efficacy                                                                                                                                                                                                    |
| [110]                   | Fanti<br>2017      | N = 1200<br>(9,38) | Developmental<br>heterogeneity                                       | Experience low parental involvement and high parental<br>distress<br>report low peer support and school connectedness                                                                                                                                                                                         |
| [94]                    | Grotzinger<br>2018 | N = 891<br>(15,91) | Links with testos-<br>terone and cortisol                            | High levels of CU traits linked to lack of parental monitoring                                                                                                                                                                                                                                                |
| [112]                   | Horan<br>2016      | N = 942<br>(8,07)  | Academic<br>outcomes                                                 | CU traits are associated with lower quality student–teacher<br>relationships                                                                                                                                                                                                                                  |
| [87]                    | Kimonis<br>2019    | N = 23<br>(4,5)    | Parent-Child<br>interaction<br>therapy                               | Family intervention produced decreases in child conduct<br>problems and CU traits                                                                                                                                                                                                                             |
| Links between CU traits |                    |                    |                                                                      |                                                                                                                                                                                                                                                                                                               |
| [113]                   | Kochanska<br>2015  | N = 82<br>(5,5)    | Parenting<br>environment                                             | Variations in positive parenting predicted cooperation with<br>monitoring and negative attitude toward substance use;<br>variations in power-assertive parenting predicted<br>internalization of adult values and callous–unemotional traits.                                                                 |
| [96]                    | Masi<br>2018       | N = 144<br>(8,7)   | Developmental<br>trajectories                                        | Positive parenting does not predict CU according to the model                                                                                                                                                                                                                                                 |
| [114]                   | McDonald<br>2017   | N = 291<br>(9,07)  | Exposure to<br>domestic and<br>animal violence                       | Effects of animal maltreatment exposure on externalizing<br>problems are mediated through callousness                                                                                                                                                                                                         |

|       |                   |                     |                                                      |                                                                                                                                                                                                                                                                                                                                                                                                                 |
|-------|-------------------|---------------------|------------------------------------------------------|-----------------------------------------------------------------------------------------------------------------------------------------------------------------------------------------------------------------------------------------------------------------------------------------------------------------------------------------------------------------------------------------------------------------|
| [115] | Meffert<br>2018   | N = 72<br>(13,78)   | Prior trauma<br>exposure                             | Significant link between prior trauma exposure and CU traits                                                                                                                                                                                                                                                                                                                                                    |
| [117] | Muratori<br>2016  | N = 126<br>(10,0)   | Positive and<br>negative<br>parenting<br>practices   | No significant cross-lagged path was found between negative<br>parenting and CU traits                                                                                                                                                                                                                                                                                                                          |
| [121] | Scavinius<br>2019 | N = 576<br>(14,5)   | Functional<br>Family Therapy                         | Significant effect of FFT : Girls had significantly greater<br>improvements in peer problems and family functioning, and<br>boys benefited more in increased liking of school                                                                                                                                                                                                                                   |
| [124] | Sourander<br>2016 | N = 464<br>(4,5)    | Internet-assisted<br>parent training<br>intervention | Results reveals the effectiveness and feasibility of an Internet-<br>assisted parent training intervention offered for parents of<br>preschool children with disruptive behavioral                                                                                                                                                                                                                              |
| [88]  | Takahashi<br>2020 | N = 8958<br>(11,08) | Genetic and<br>environmental<br>influences           | Nonshared environment made a modest contribution to the<br>baseline level of CU traits (21.7%)                                                                                                                                                                                                                                                                                                                  |
| [76]  | Wall<br>2016      | N = 1366<br>(9,38)  | Characteristics<br>of children with<br>ou without CU | Parenting less maternal involvement and less connectedness to<br>school                                                                                                                                                                                                                                                                                                                                         |
| [125] | Waller<br>2015    | N = 364<br>(3,0)    | Parental<br>harshness                                | Correlation between CU traits and ODD/CD<br>Twin differences in parental harshness were related to<br>differences in both aggression and CU traits, such that the<br>twin who received harsher parenting had higher aggression<br>and more CU traits.<br>Differences in parental warmth were related to differences in<br>CU traits, such that the twin receiving warmer parenting<br>presented lower CU traits |
| [36]  | Waller<br>2018    | N = 454<br>(7,8)    | Parenting and<br>behavior<br>problems                | CU behavior moderated crosssectional correlations between<br>parent-reported and observed warmth and child behavior<br>problems.                                                                                                                                                                                                                                                                                |
| [128] | Wilkinson<br>2020 | N = 108<br>(8,88)   | Teacher-<br>Student<br>Relationship                  | CU traits are associated with higher teacher-student closeness                                                                                                                                                                                                                                                                                                                                                  |

Table S6. Summary of results – Social Adjustment

| Ref.<br>No | First author<br>Year | Sample<br>(Age mean) | Topic | Summary of results |
|------------|----------------------|----------------------|-------|--------------------|
|------------|----------------------|----------------------|-------|--------------------|

|       |                    |                    |                                                                    |                                                                                                                                                                   |
|-------|--------------------|--------------------|--------------------------------------------------------------------|-------------------------------------------------------------------------------------------------------------------------------------------------------------------|
| [7]   | Bird<br>2019       | N = 437<br>(12,50) | Performance in<br>English, Science<br>and Math grades              | Children with CU traits have less concern for consequences of<br>aggression including anticipated feelings of remorse,<br>disciplinary action, or victim distress |
| [110] | Fanti<br>2017      | N = 1200<br>(9,38) | Developmental<br>heterogeneity                                     | Score lower social competence and self-regulation                                                                                                                 |
| [94]  | Grotzinger<br>2018 | N = 891<br>(15,91) | Links with testos-<br>terone and cortisol                          | High levels of CU traits linked increased aggression                                                                                                              |
| [80]  | Hitti<br>2019      | N = 265<br>(12,27) | Effects of anger<br>dysregulation                                  | Significant links with increased aggression                                                                                                                       |
| [113] | Kochanska<br>2015  | N = 82<br>(5,5)    | Parenting<br>environment                                           | Children with CD/CU who received optimal parenting had a<br>more adaptive outcome than their low-risk peers (attitude<br>toward substance)                        |
| [115] | Meffert<br>2018    | N = 72<br>(13,78)  | Prior trauma<br>exposure                                           | Significant link between CU traits and social adjustment<br>(delinquency) by trauma exposure influence                                                            |
| [116] | Mozley<br>2018     | N = 829<br>(16,07) | Trauma<br>exposure and<br>overmodulation                           | Overmodulation is associated with CU traits which are in turn<br>associated with recidivism                                                                       |
| [77]  | Thomson<br>2020    | N = 62<br>(12,54)  | Emotional<br>reactivity and<br>(para)<br>sympathetic<br>reactivity | Youths with CU traits self-reported more antisocial behaviours                                                                                                    |

Table S7. Summary of results – Social interactions and social roles dimension

| Ref.<br>No | First author<br>Year | Sample<br>(Age mean) | Topic                                       | Summary of results                                                                                                                               |
|------------|----------------------|----------------------|---------------------------------------------|--------------------------------------------------------------------------------------------------------------------------------------------------|
| [69]       | Aghajani<br>2017     | N = 74<br>(16,96)    | Connectivity of<br>amygdala                 | Significant difference in substance abuse                                                                                                        |
| [107]      | Dackis<br>2015       | N = 132<br>(10,36)   | Effects of child<br>maltreatment            | Children with high CU linked with elevated antisocial behavior<br>increased aggressive behavior and delinquent acts<br>(environmental influence) |
| [84]       | Fagan<br>2017        | N = 339<br>(9,6)     | Autonomic nerv-<br>ous system activ-<br>ity | Significant links with antisocial behavior (females)                                                                                             |
| [94]       | Grotzinger<br>2018   | N = 891<br>(15,91)   | Links with testos-<br>terone and cortisol   | High levels of CU traits linked to high levels of rule breaking<br>peer deviance                                                                 |

|       |                   |                    |                                          |                                                                                                                                                         |
|-------|-------------------|--------------------|------------------------------------------|---------------------------------------------------------------------------------------------------------------------------------------------------------|
| [80]  | Hitti<br>2019     | N = 265<br>(12,27) | Effects of anger<br>dysregulation        | Significant correlations examining the relations between more<br>global beliefs supporting aggression and aggression in peer<br>and dating contexts     |
| [87]  | Kimonis<br>2019   | N = 23<br>(4,5)    | Parent-Child<br>interaction<br>therapy   | By 3 months posttreatment, 75% of treatment completers no<br>longer showed clinically significant conduct problems relative<br>to 25% of dropouts       |
| [113] | Kochanska<br>2015 | N = 82<br>(5,5)    | Parenting envi-<br>ronment               | Parent report of children's socialization outcomes and CU<br>traits; internalization of parent' values have significant effects<br>toward substance use |
| [79]  | Levy<br>2017      | N = 67<br>(16,2)   | Oxytocin levels                          | Significant effect CU traits on misadaptation (aggression)                                                                                              |
| [116] | Mozley<br>2018    | N = 829<br>(16,07) | Trauma<br>exposure and<br>overmodulation | Significant correlation between CU traits and aggression                                                                                                |
| [125] | Waller<br>2015    | N = 364<br>(3,0)   | Parental<br>harshness                    | Correlation between CU aggressivity                                                                                                                     |

Table S8. Summary of results – Cognitive dimension

| Ref.<br>No | First author<br>Year | Sample<br>(Age mean) | Topic                                                                | Summary of results                                                                                                                                                                                        |
|------------|----------------------|----------------------|----------------------------------------------------------------------|-----------------------------------------------------------------------------------------------------------------------------------------------------------------------------------------------------------|
| [69]       | Aghajani<br>2017     | N = 74<br>(16.96)    | Connectivity of<br>amygdala                                          | Attention-emotion-interactions are perturbed, which could bias<br>salience processing and associative learning in youth with<br>CD/CU                                                                     |
| [104]      | Bedford<br>2019      | N = 79<br>(3,5)      | Executive function<br>as protective fac-<br>tors                     | Infant with irregular executive functions (EF) at T1 are<br>associated with CU traits at T2                                                                                                               |
| [7]        | Bird<br>2019         | N = 437<br>(12.50)   | Performance in<br>English, Science<br>and Math grades                | CU traits are significantly related to lower English, Math and<br>Science grades when controlling for age, gender,<br>sociodemographic disadvantage (lower Science grades for<br>boys only not for girls) |
| [70]       | Crum<br>2016         | N = 1554<br>(8.13)   | Compare children<br>with ODD alone,<br>CU alone, both<br>and neither | ADHD with CU traits are robustly associated with end-of-<br>the-year impairment (EF)                                                                                                                      |
| [109]      | Elizur<br>2017       | N = 209<br>(4.01)    | Parent training's<br>effects                                         | Significant links between EF and traits CU                                                                                                                                                                |

|       |                   |                    |                                                |                                                                                                                                                                                                                                         |
|-------|-------------------|--------------------|------------------------------------------------|-----------------------------------------------------------------------------------------------------------------------------------------------------------------------------------------------------------------------------------------|
| [72]  | Erdogan<br>2017   | N = 51<br>(5,25)   | Attentional orientation and emotions           | Temperamental self-regulation is negatively related to CU traits and ODD-related problems                                                                                                                                               |
| [21]  | Ezpeleta<br>2017a | N = 622<br>(3,77)  | Co-occurrence with anxiety and ODD levels      | Results show deficits in executive functioning, attentional process.                                                                                                                                                                    |
| [84]  | Fagan<br>2017     | N = 339<br>(9,6)   | Autonomic nervous system activity              | Significant links between CU traits and impulsivity (EF)                                                                                                                                                                                |
| [110] | Fanti<br>2017     | N = 1200<br>(9,38) | Developmental heterogeneity                    | Lower scores on academic performance, EF                                                                                                                                                                                                |
| [111] | Graziano<br>2019  | N = 249<br>(4,96)  | Executive function and emotion regulation      | Children with CU/high- were rated as having significantly poorer ER and EF compared to other groups                                                                                                                                     |
| [112] | Horan<br>2016     | N = 942<br>(8,07)  | Academic outcomes                              | CU traits are associated with worse performance on standardized math and reading exams over and above the effects of conduct problems.                                                                                                  |
| [119] | O'Kearney<br>2017 | N = 124<br>(5,8)   | Empathic processing and cortex                 | Impairments in emotion perceptiveness and understanding mixed emotions in ODD boys are associated with the presence of a high level of CU                                                                                               |
| [85]  | Rizeq<br>2020     | N = 81<br>(9,54)   | Executive functions                            | CU traits and parent ratings of executive dysfunction were uniquely correlated with elevated conduct problems and oppositional and defiant behavior                                                                                     |
| [81]  | Sethi<br>2018     | N = 95<br>(14,4)   | Empathic processing                            | No difference between groups regarding IQ                                                                                                                                                                                               |
| [123] | Short<br>2016b    | N = 99<br>(16,6)   | Comorbid anxiety and emotion recognition       | CD was associated with a generalised impairment in emotion recognition (EF)                                                                                                                                                             |
| [76]  | Wall<br>2016      | N = 1366<br>(9,38) | Characteristics of children with or without CU | The high-CU group had significantly executive functioning deficits                                                                                                                                                                      |
| [127] | White<br>2016     | N = 56<br>(14,74)  | Neural correlates                              | Ventromedial prefrontal cortex responsiveness and ventromedial prefrontal cortex-amygdala connectivity were related to patients' retaliatory propensity (behavioral responses during the task) and parent-reported reactive aggression. |

|       |                    |                   |                                        |                                                                                                                                                                                                                                                                                                 |
|-------|--------------------|-------------------|----------------------------------------|-------------------------------------------------------------------------------------------------------------------------------------------------------------------------------------------------------------------------------------------------------------------------------------------------|
| [128] | Wilkinson<br>2020  | N = 108<br>(8,88) | Teacher–<br>Student<br>Relationship    | CU traits are associated with bad emotional regulation (FE)                                                                                                                                                                                                                                     |
| [78]  | Winstanley<br>2020 | N = 145<br>(14,6) | Developmental<br>language<br>disorders | Young with developmental language disorder are more than twice as likely to reoffend than their unaffected offending peers. The elevated risk of reoffending was not explained by nonverbal IQ, deprivation score, the presence of a neurodevelopmental disorder or callous–unemotional traits. |
